# Supplementary material for: Cross-sectional analysis of pharmaceutical payments to Japanese board-certified gastroenterologists between 2016 and 2019
Source: HighWire-hosted journal article supplement (doi:10.1136/bmjopen-2022-068237), 2023-04-01

Supplemental Material 1. Distribution of payment values per gastroenterologist

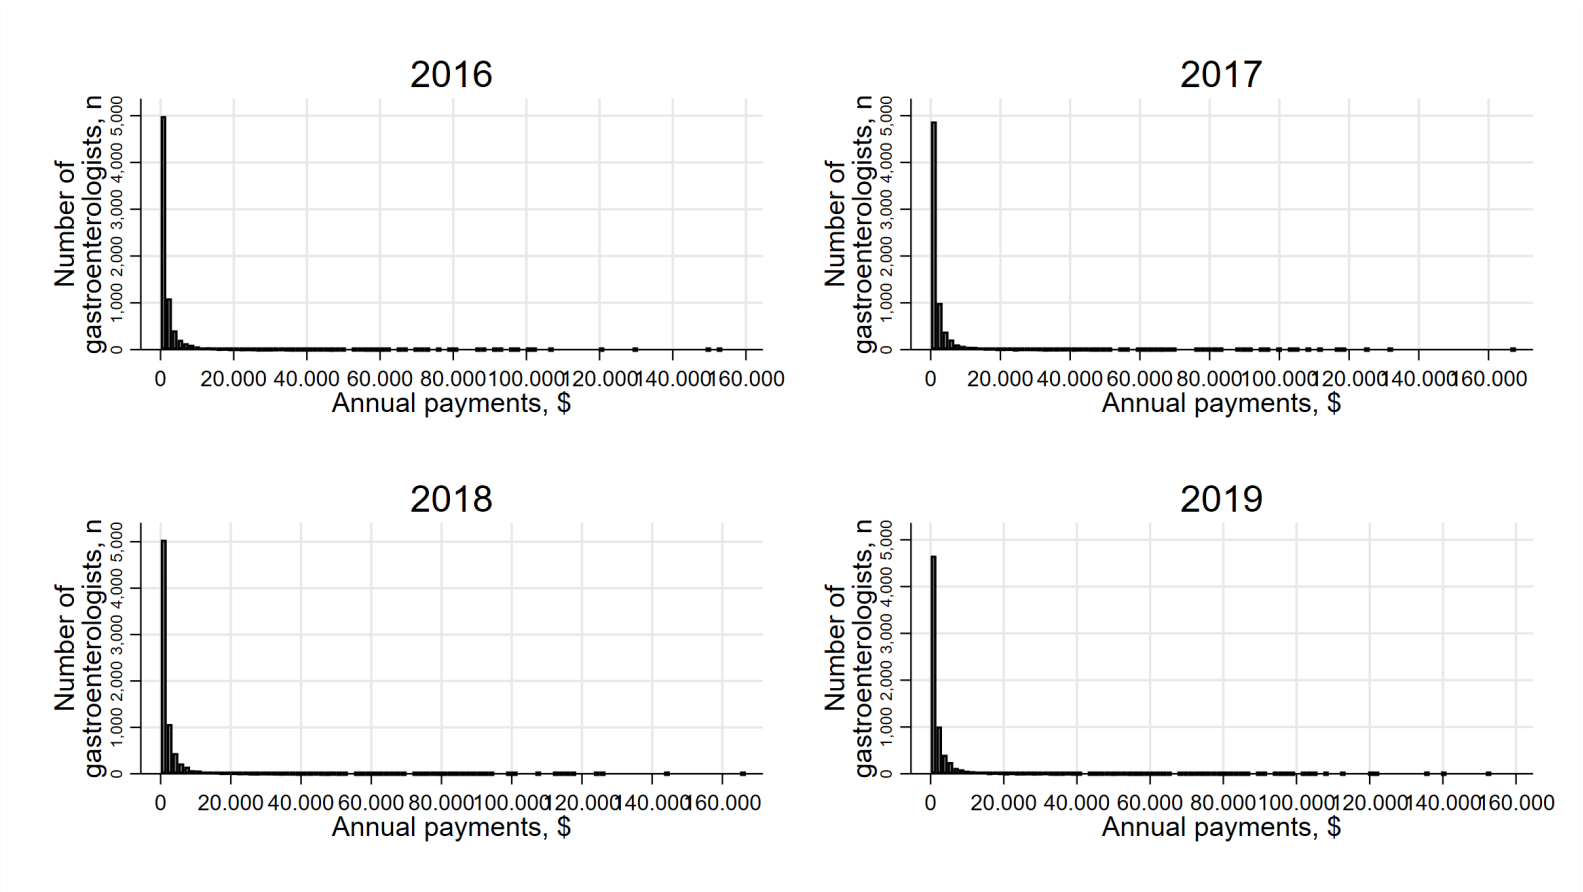

Supplemental Material 2. Payment concentration

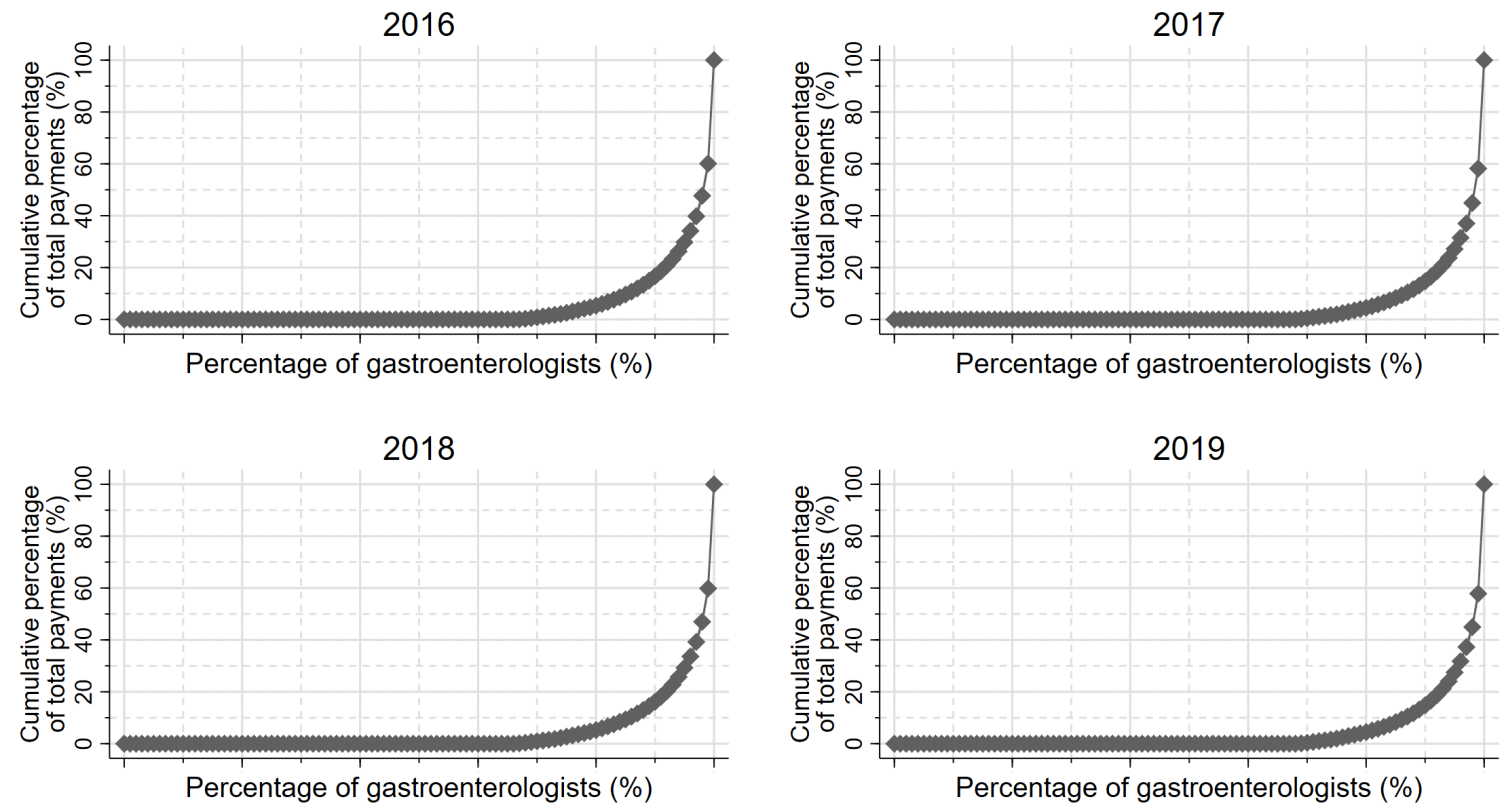

Supplemental Material 3. Payments to board members and clinical practice guideline authors with the board certification as gastroenterologists

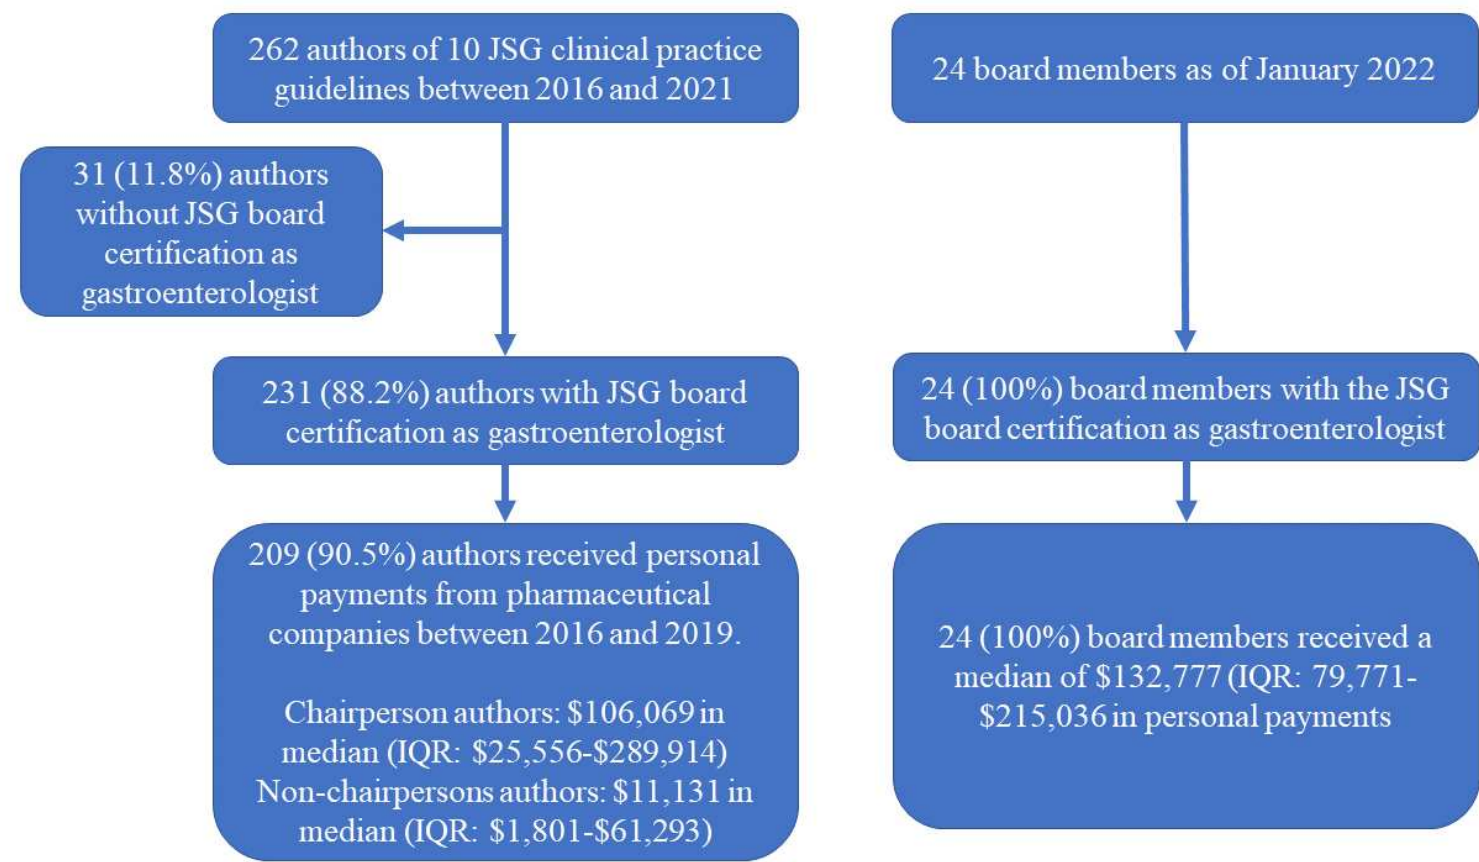

Supplemental Material 4. Payment categories by company

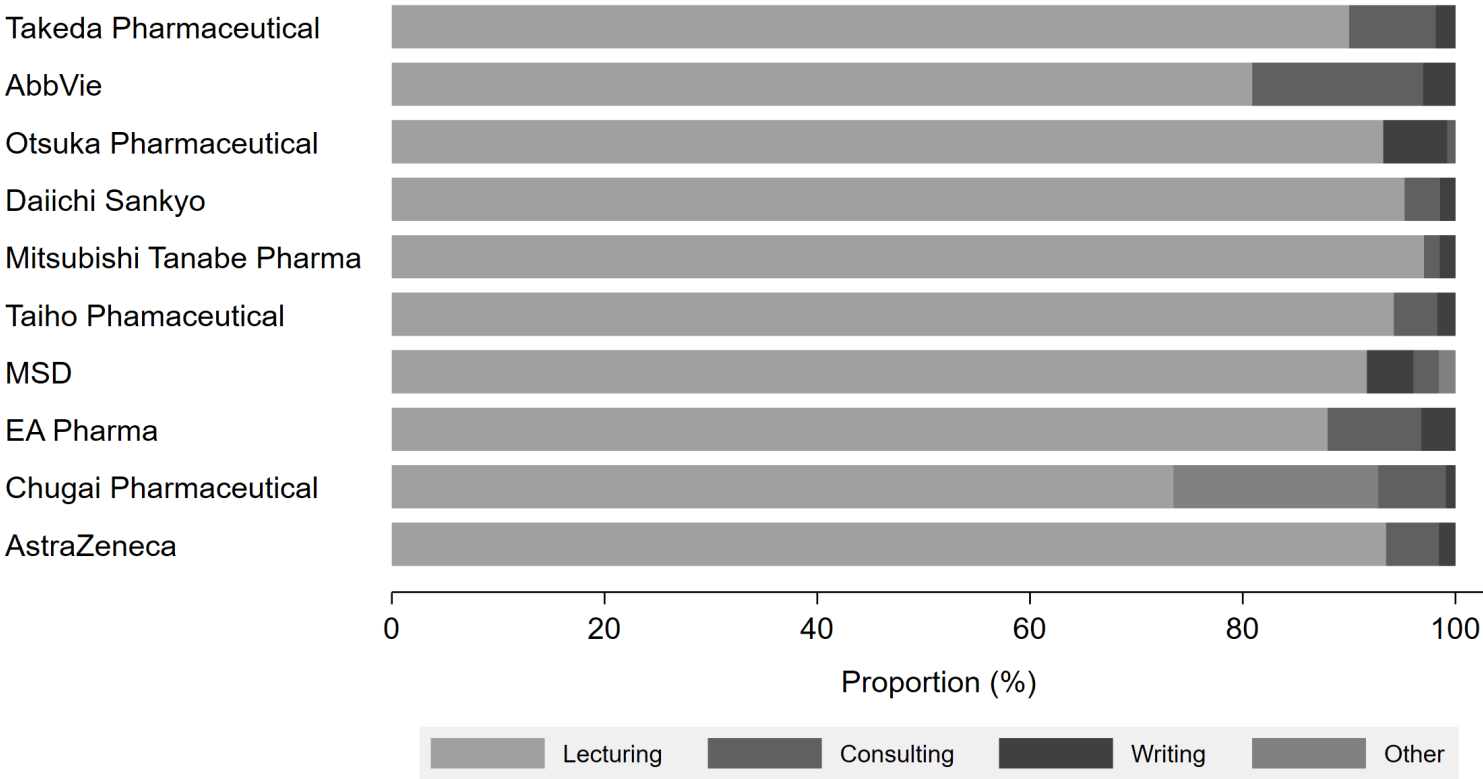

Supplement: bmjopen-2022-068237supp001_data_supplement.pdf [file bmjopen-2022-068237supp001_data_supplement.pdf]
